# Supplementary material for: CCDC113 promotes colorectal cancer tumorigenesis and metastasis via TGF-β signaling pathway
Source: PubMed Central journal article supplement (PMC11390942; doi:10.1038/s41419-024-07036-3), 2024-09-11
Supplement: 41419_2024_7036_MOESM1_ESM.pdf [file 41419_2024_7036_MOESM1_ESM.pdf]

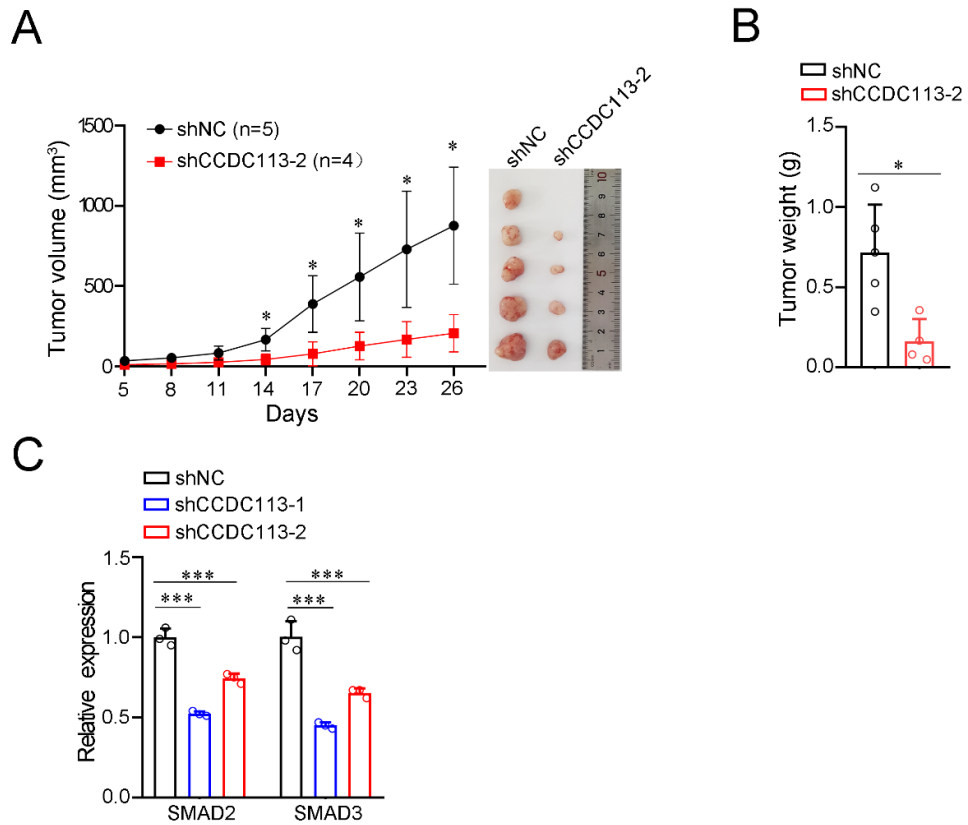

### Supplementary Figure legends

**Figure S1. *In vivo* and *in vitro* assays of CCDC113 knockdown HCT116 cells.** (A-B) CCDC113 knockdown HCT116 cells and control cells were subcutaneously injected into BALB/c nude mice for 26 days. Tumor volumes (A), images of subcutaneous xenograft tumors (A) and tumor weights (B) were shown. (C) *SMAD2* and *SMAD3* mRNA levels in shCCDC113 and shNC HCT116 cells were detected by qRT-PCR. Data are presented as means  $\pm$  SD. \*\*\* $p < 0.001$ , \* $p < 0.05$ .
